# Supplementary material for: JASPer controls interphase histone H3S10 phosphorylation by chromosomal kinase JIL-1 in Drosophila
Source: PubMed Central journal article supplement (PMC6877644; doi:10.1038/s41467-019-13174-6), 2019-11-25
Supplement: 41467_2019_13174_MOESM3_ESM.pdf [file 41467_2019_13174_MOESM3_ESM.pdf]

### **Description of Additional Supplementary Files**

File Name: Supplementary Data 1

Description: The JASPer interaction network. Table of complete IP-MS data presented in figure 7 reporting mean log<sub>2</sub> fold enrichment in  $\alpha$ -JASPer IP from nuclear extract from fly embryos (n = 6) versus control IP (n = 5) and associated p-values.
